# Supplementary material for: Biological control ofS-nitrosothiol reactivity: potential role of sigma-hole interactions
Source: Royal Society of Chemistry journal article supplement (doi:10.1039/c9cp06377c), 2020-01-01
Supplement: c9cp06377c1.pdf [file c9cp06377c1.pdf]

# **Biological Control of S-Nitrosothiol Reactivity: The Potential Role of Sigma-Hole Interactions**

Niloufar Hendinejad and Qadir K. Timerghazin\*

Department of Chemistry, Marquette University, PO Box 1881, Milwaukee, WI 53201-1881, United States

E-mail: qadir.timerghazin@marquette.edu

## **Supporting Information**

## Supporting Figures

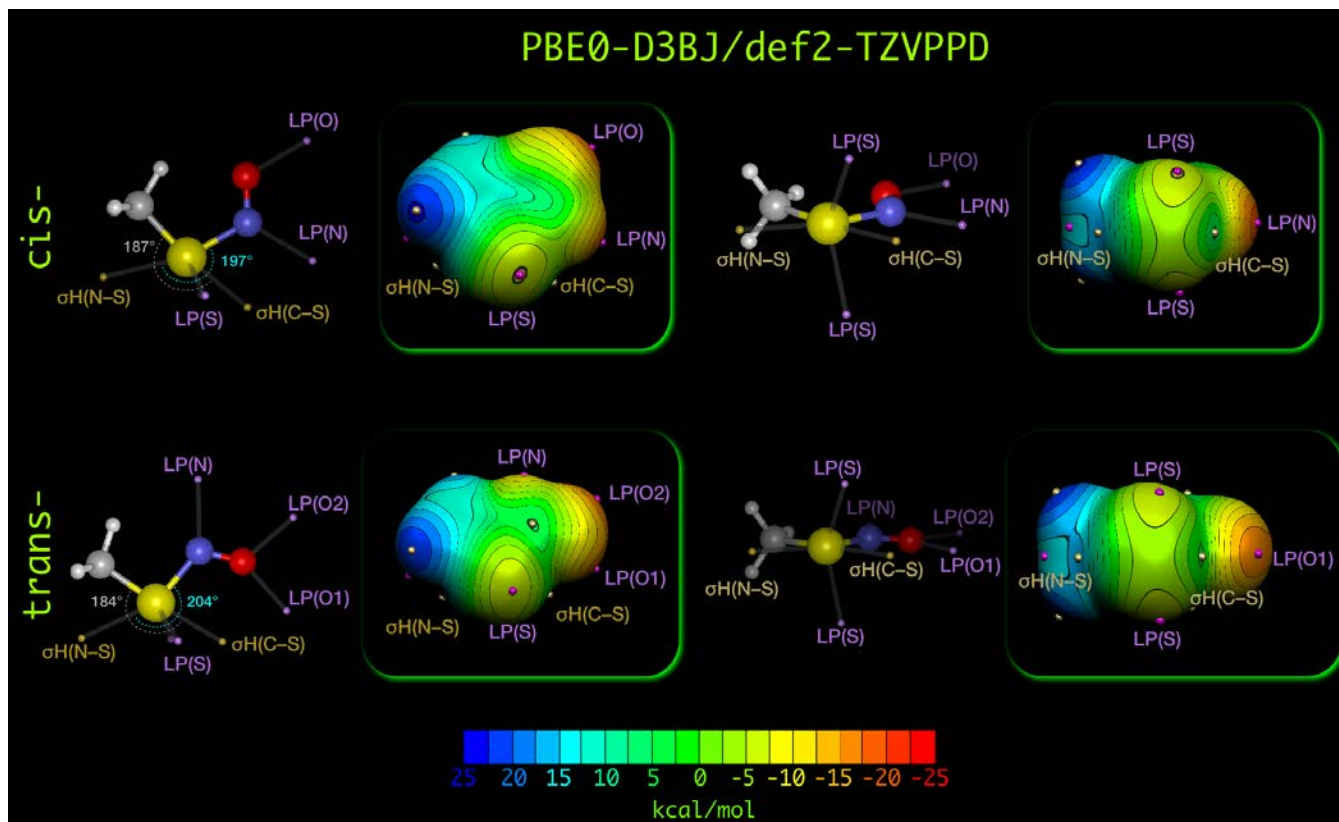

Fig. S1. Top and side views of the molecular electrostatic potential (MEP) of *cis*- and *trans*-CH<sub>3</sub>SNO calculated at the PBE0-D3BJ/def2-TZVPP level mapped onto the electron density isosurface (0.001 au). Surface MEP minima ( $V_{S,\min}$ ) and maxima ( $V_{S,\max}$ ) are shown as purple and golden dots, respectively. Reference molecular geometries with select relevant  $V_{S,\min}$  and  $V_{S,\max}$  points are shown left of the corresponding MEP maps.

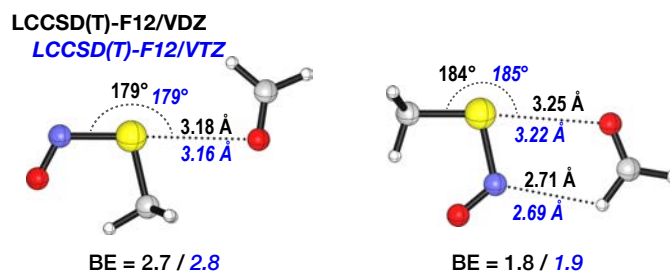

Fig. S2. Comparative geometry studied of *cis*-CH<sub>3</sub>SNO binary complexes with formaldehyde in gas phase within LCCSD(T)-F12/VDZ and LCCSD(T)-F12/VTZ.

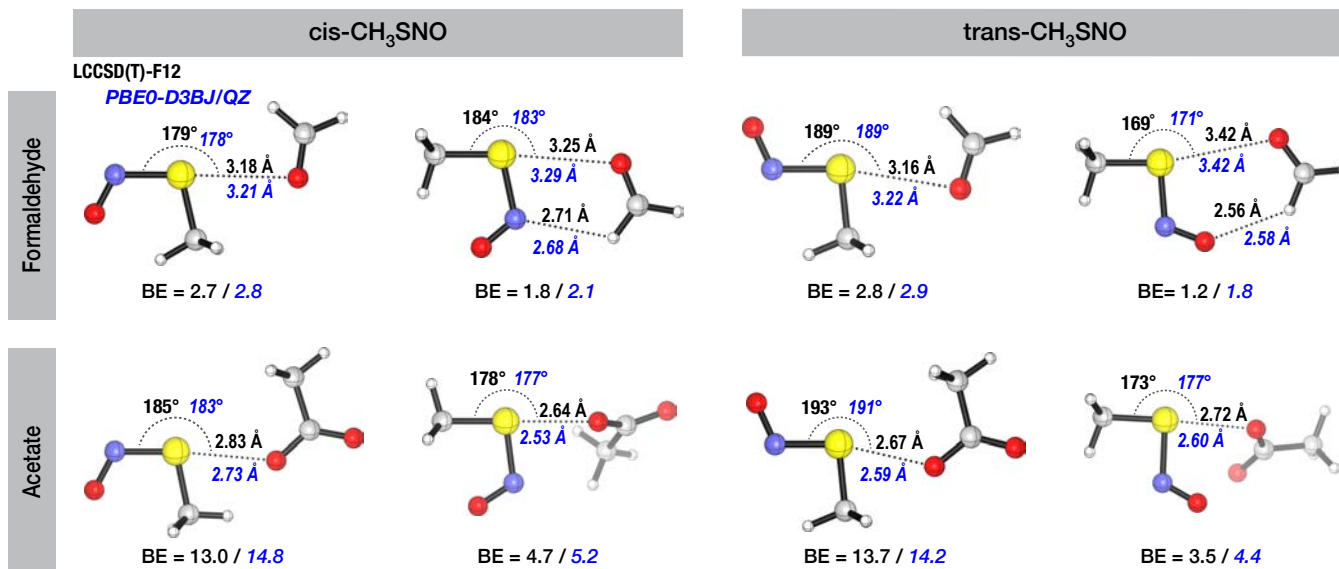

Fig. S3.  $\sigma$ -Hole bound complexes of CH<sub>3</sub>SNO with formaldehyde, acetate with relevant geometric parameters and binding energies (*BE*) calculated with LCCSD(T)-F12/VDZ-F12 (black typeface) and PBE0-D3BJ/def2-QZVPP (blue typeface).

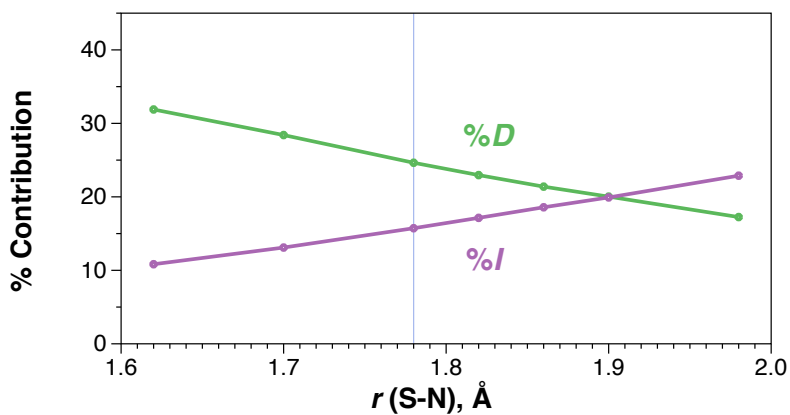

Fig. S4. Natural Resonance Theory weights vs S–N bond length in *cis*-CH<sub>3</sub>SNO molecule. Blue line shows the equilibrium S–N distance.

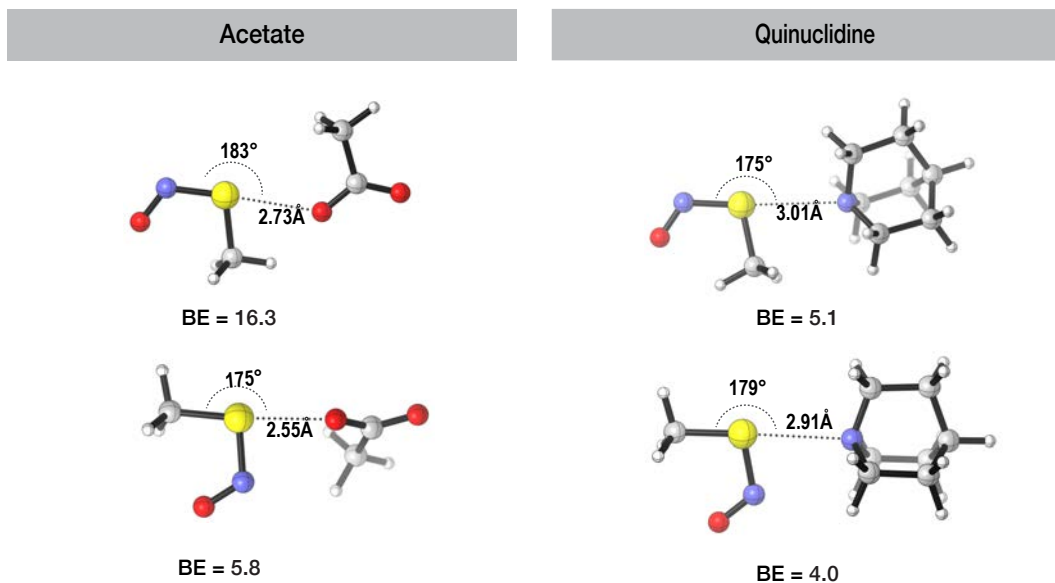

Fig. S5.  $\sigma$ -Hole bound complexes of *cis*-CH<sub>3</sub>SNO with shortened S–N bond (1.65 Å) with acetate and quinuclidine with relevant geometric parameters and binding energies (*BE*) in the gas phase calculated within PBE0-D3BJ/def2-TZVPPD.

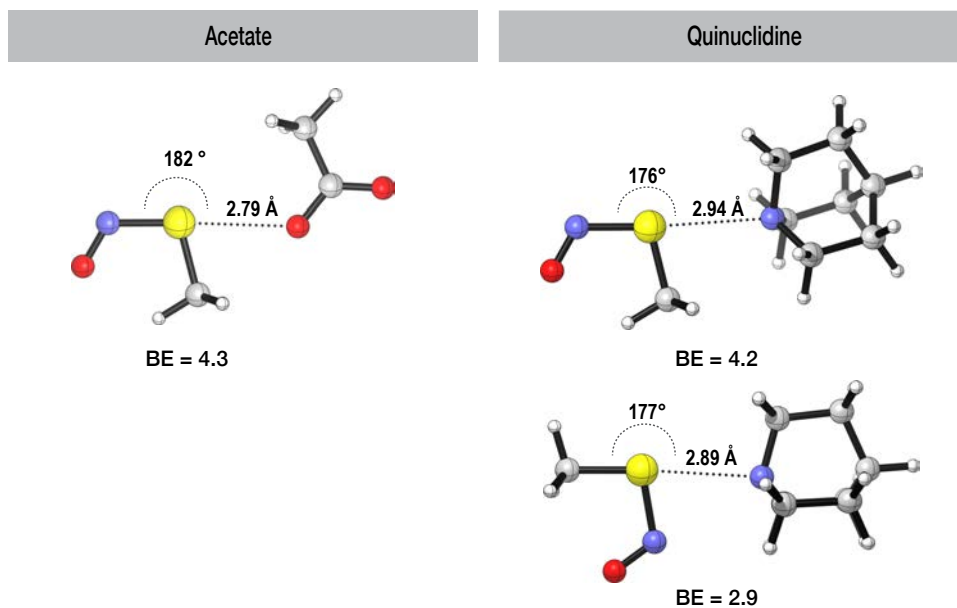

Fig. S6.  $\sigma$ -Hole bound complexes of *cis*-CH<sub>3</sub>SNO with acetate and quinuclidine with relevant geometric parameters and binding energies (*BE*) in diethylether calculated within PBE0-D3BJ-PCM( $\epsilon=4.2$ )/def2-TZVPPD

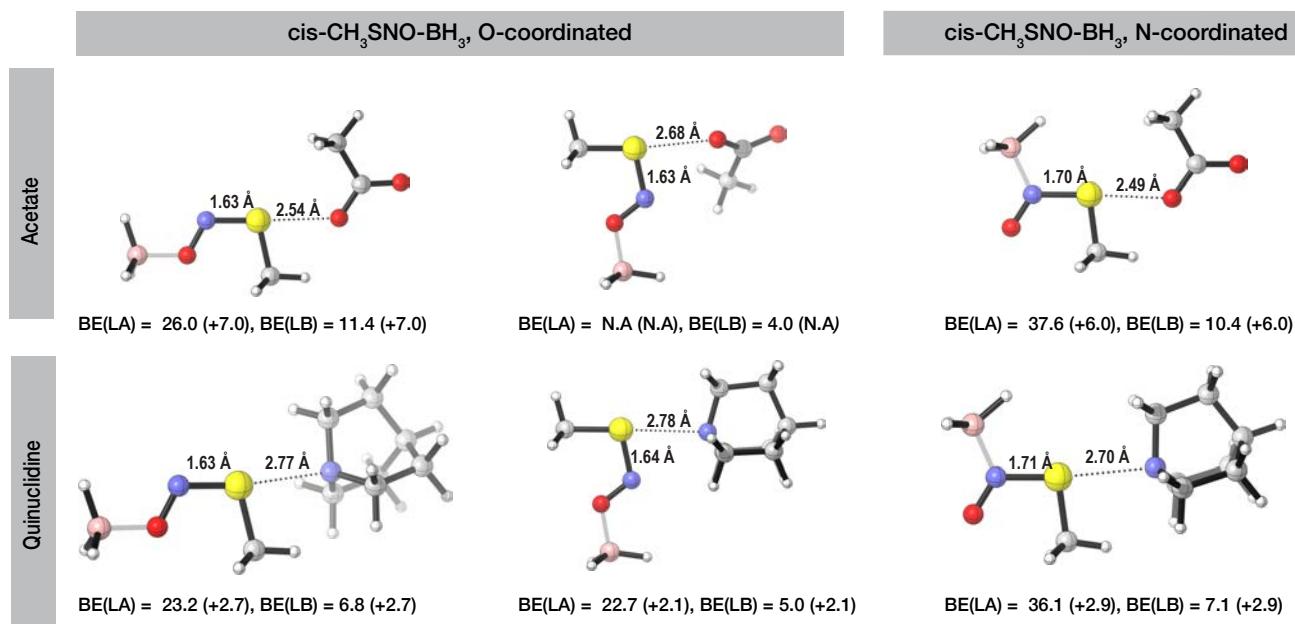

Fig. S7.  $\sigma$ -Hole bound complexes of *cis*-CH<sub>3</sub>SNO with acetate and quinuclidine as Lewis bases and borane as Lewis acid with relevant geometric parameters and binding energies (*BE*) calculated with PBE0-D3BJ-PCM( $\epsilon=4.2$ )/def2-TZVPPD. The values in parenthesis indicate enhancement of the binding energies with respect to the binary complexes.

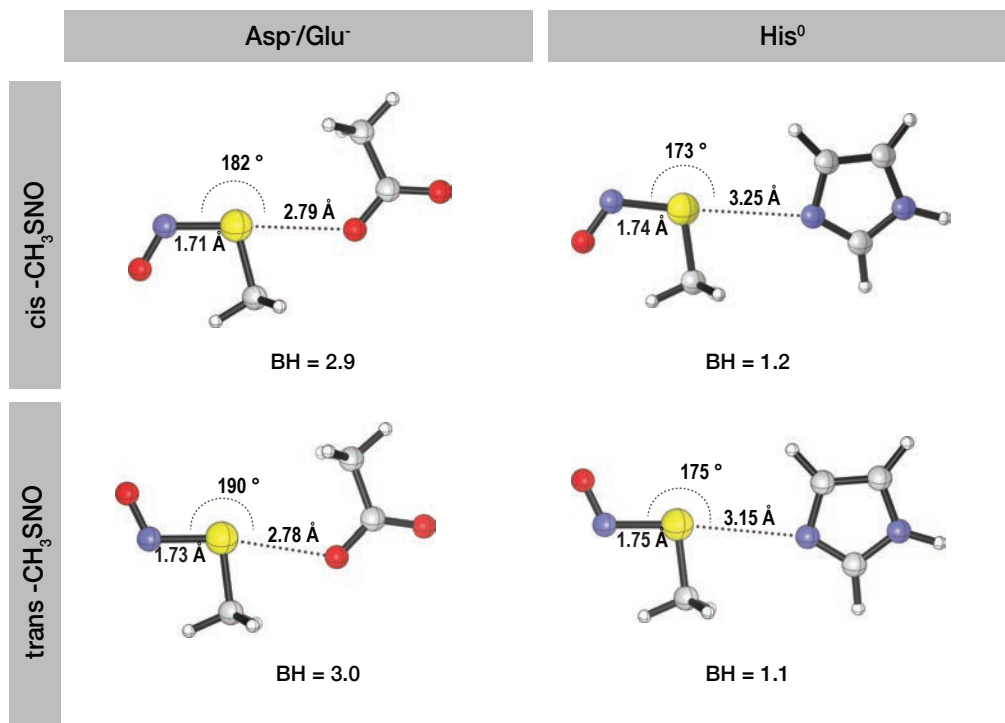

Fig. S8.  $\sigma$ -Hole bound complexes of *cis*- and *trans*-CH<sub>3</sub>SNO with Asp<sup>-</sup>/Glu<sup>-</sup> and His<sup>0</sup> models as Lewis bases at CH<sub>3</sub>SNO sulfur, with relevant geometric parameters and binding enthalpies (*BH*) calculated with PBE0-D3BJ-PCM( $\epsilon=4.2$ )/def2-TZVPPD.

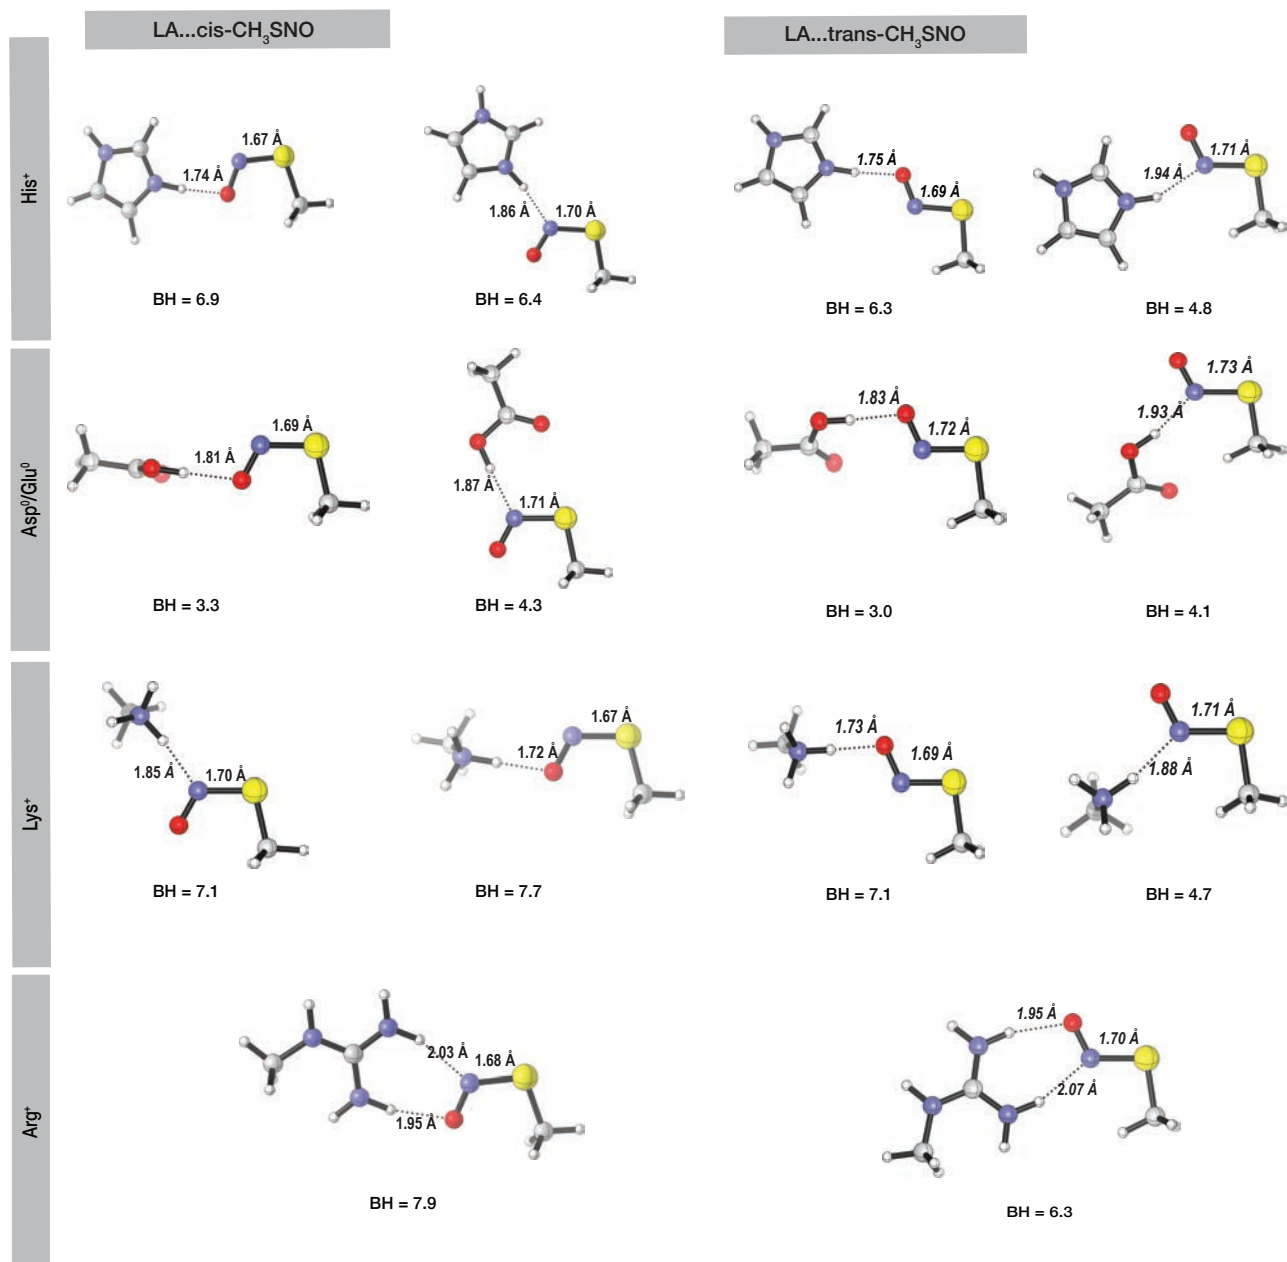

Fig. S9.  $\sigma$ -Hole bound complexes of *cis*- and *trans*-CH<sub>3</sub>SNO with His<sup>0</sup>, Asp<sup>0</sup>/Glu<sup>0</sup>, Lys<sup>+</sup> and Arg<sup>+</sup> models as Lewis acids with relevant geometric parameters and binding enthalpies (*BH*) calculated with PBE0-D3BJ-PCM( $\epsilon=4.2$ )/def2-TZVPPD.

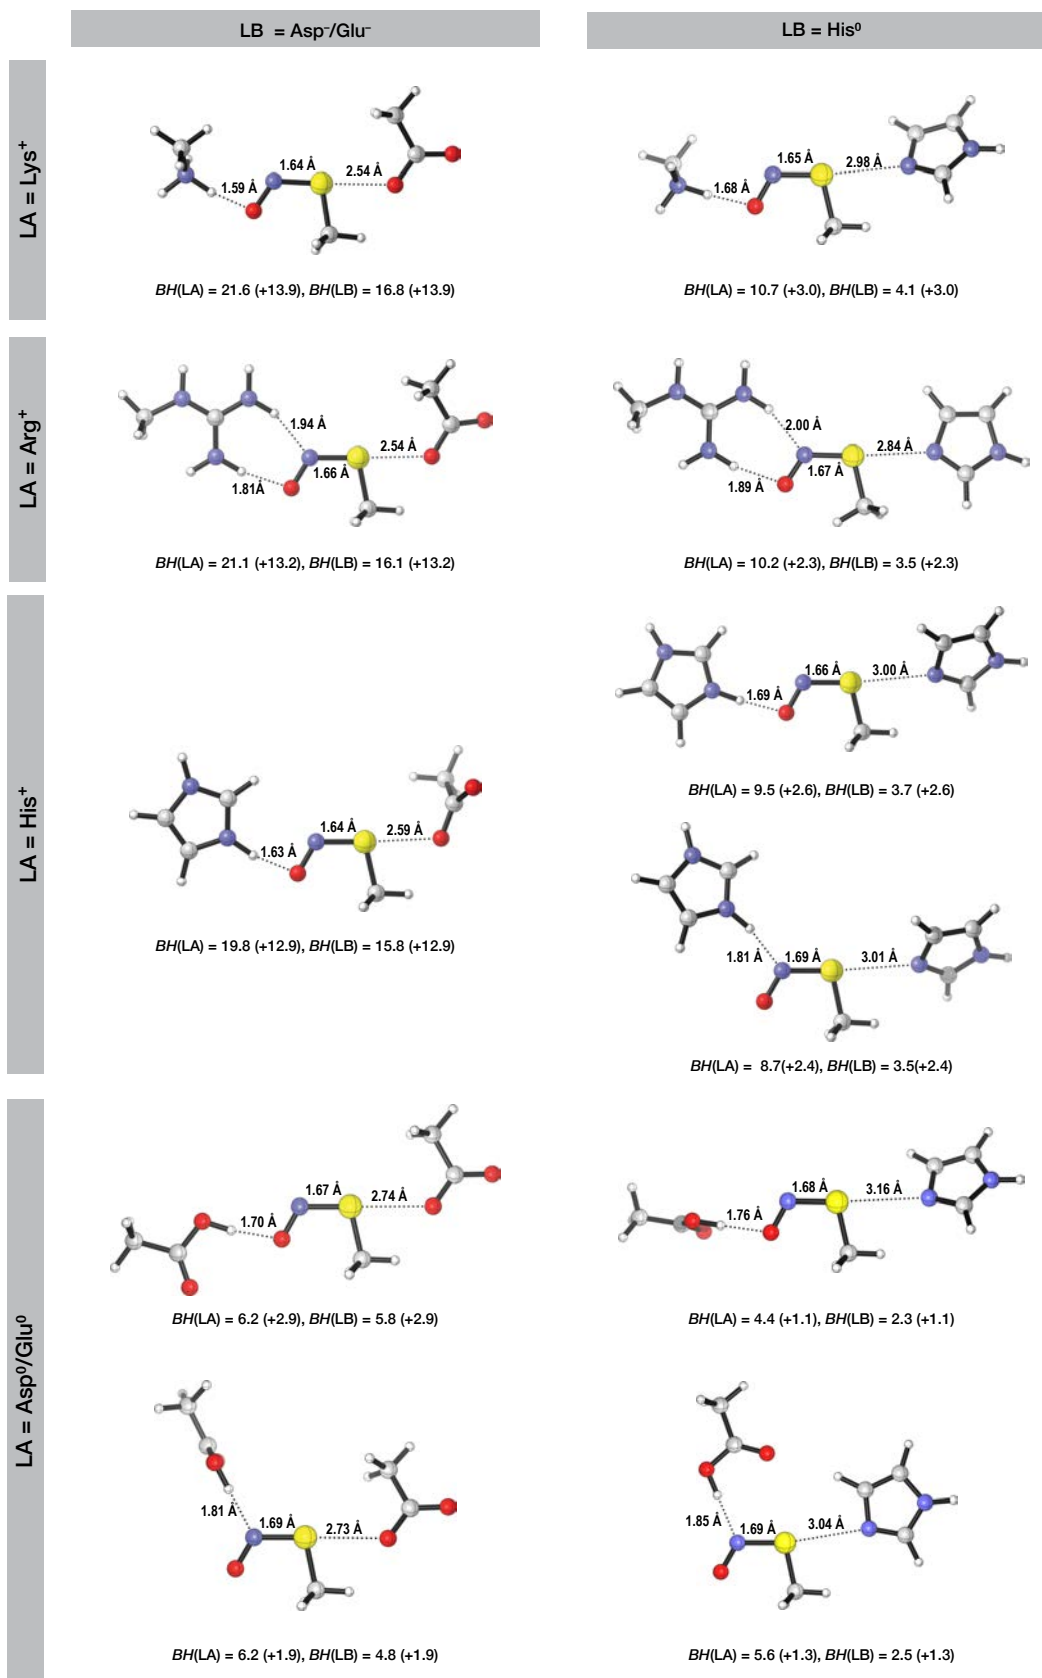

Fig. S10.  $\sigma$ -Hole bound ternary complexes of *cis*-CH<sub>3</sub>SNO with His<sup>+</sup>, Asp<sup>0</sup>/Glu<sup>0</sup>, Lys<sup>+</sup> and Arg<sup>+</sup> models as Lewis acids and His<sup>0</sup>, Asp<sup>-</sup>/Glu<sup>-</sup> models with relevant geometric parameters and binding enthalpies (*BH*) calculated with PBE0-D3BJ-PCM( $\epsilon=4.2$ )/def2-TZVPPD. The values in parenthesis indicate enhancement of the binding energies with respect to the binary complexes.

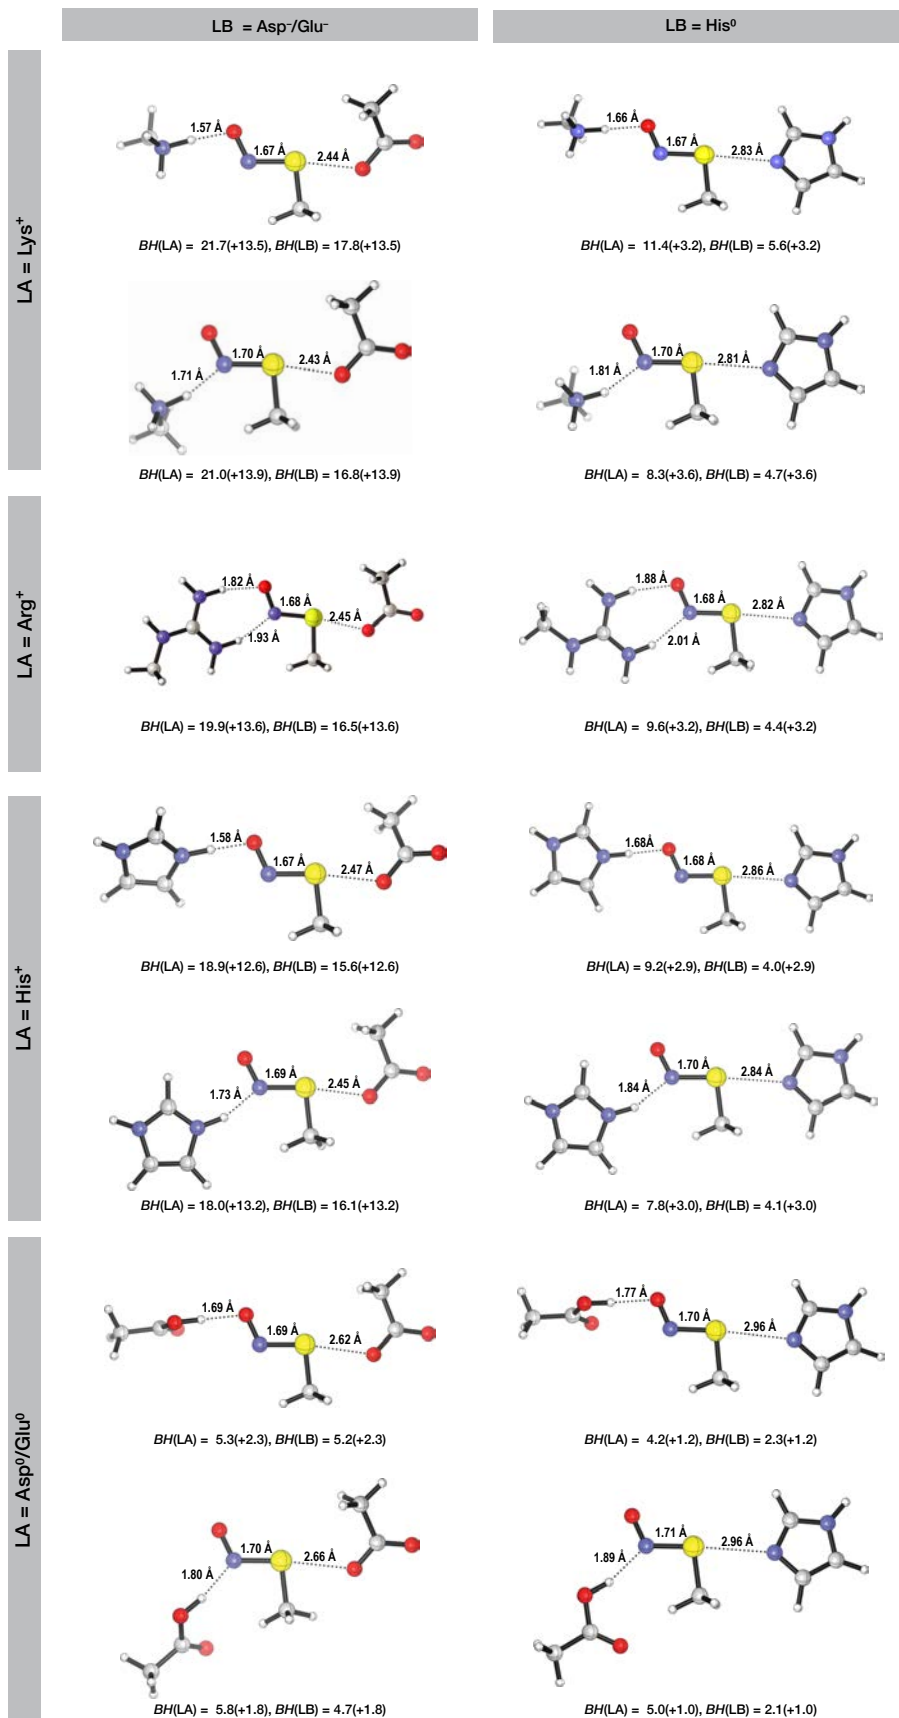

Fig. S11.  $\sigma$ -Hole bound ternary complexes of *trans*-CH<sub>3</sub>SNO with models of His<sup>+</sup>, Asp<sup>0</sup>/Glu<sup>0</sup>, Lys<sup>+</sup> and Arg<sup>+</sup> as Lewis acids and models of His<sup>0</sup>, Asp<sup>0</sup>/Glu<sup>-</sup> with relevant geometric parameters and binding enthalpies (*BH*) calculated with PBE0-D3BJ-PCM( $\epsilon=4.2$ )/def2-TZVPPD. The values in parenthesis indicate enhancement of the binding energies with respect to the binary complexes.



## Supporting Tables

**Table S1. LB-S intermolecular bond lengths in  $\sigma$ -Hole bound CH<sub>3</sub>SNO complexes (in Å); PBE0- D3BJ/def2-TZVPPD calculations.**

| Complex                                                       | N-S or C-S | BH <sub>3</sub> at O or N | LB <sup>+</sup> S Interaction | $r(Y^{\cdots}S)$ |
|---------------------------------------------------------------|------------|---------------------------|-------------------------------|------------------|
| <i>cis</i> -CH <sub>3</sub> SNO-CH <sub>2</sub> O             | N-S        |                           | O <sup>+</sup> S              | 3.216            |
| <i>cis</i> -CH <sub>3</sub> SNO-CH <sub>2</sub> O             | C-S        |                           | O <sup>+</sup> S              | 3.298            |
| <i>cis</i> -CH <sub>3</sub> SNO-acetate                       | N-S        |                           | O <sup>+</sup> S              | 2.734            |
| <i>cis</i> -CH <sub>3</sub> SNO-acetate                       | C-S        |                           | O <sup>+</sup> S              | 2.537            |
| <i>cis</i> -CH <sub>3</sub> SNO-quinuclidine                  | N-S        |                           | O <sup>+</sup> S              | 3.036            |
| <i>cis</i> -CH <sub>3</sub> SNO-quinuclidine                  | C-S        |                           | O <sup>+</sup> S              | 2.869            |
| <i>trans</i> -CH <sub>3</sub> SNO-CH <sub>2</sub> O           | N-S        |                           | O <sup>+</sup> S              | 3.232            |
| <i>trans</i> -CH <sub>3</sub> SNO-CH <sub>2</sub> O           | C-S        |                           | O <sup>+</sup> S              | 3.412            |
| <i>trans</i> -CH <sub>3</sub> SNO-acetate                     | N-S        |                           | O <sup>+</sup> S              | 2.595            |
| <i>trans</i> -CH <sub>3</sub> SNO-acetate                     | C-S        |                           | O <sup>+</sup> S              | 2.605            |
| <i>trans</i> -CH <sub>3</sub> SNO-quinuclidine                | N-S        |                           | S <sup>+</sup> N              | 3.029            |
| <i>trans</i> -CH <sub>3</sub> SNO-quinuclidine                | C-S        |                           | S <sup>+</sup> N              | 2.992            |
| <i>cis</i> -CH <sub>3</sub> SNO-BH <sub>3</sub> -acetate      | N-S        | O                         | O <sup>+</sup> S              | 2.422            |
| <i>cis</i> -CH <sub>3</sub> SNO-BH <sub>3</sub> -acetate      | C-S        | O                         | O <sup>+</sup> S              | 2.373            |
| <i>cis</i> -CH <sub>3</sub> SNO-BH <sub>3</sub> -acetate      | N-S        | N                         | O <sup>+</sup> S              | 2.365            |
| <i>cis</i> -CH <sub>3</sub> SNO-BH <sub>3</sub> -quinuclidine | N-S        | O                         | N <sup>+</sup> S              | 2.883            |
| <i>cis</i> -CH <sub>3</sub> SNO-BH <sub>3</sub> -quinuclidine | C-S        | O                         | N <sup>+</sup> S              | 2.774            |
| <i>cis</i> -CH <sub>3</sub> SNO-BH <sub>3</sub> -quinuclidine | N-S        | N                         | N <sup>+</sup> S              | 2.813            |
| <i>cis</i> -CH <sub>3</sub> SNO*-acetate                      | N-S        |                           | O <sup>+</sup> S              | 2.732            |
| <i>cis</i> -CH <sub>3</sub> SNO*-acetate                      | C-S        |                           | O <sup>+</sup> S              | 2.553            |
| <i>cis</i> -CH <sub>3</sub> SNO*-quinuclidine                 | N-S        |                           | N <sup>+</sup> S              | 3.007            |
| <i>cis</i> -CH <sub>3</sub> SNO*-quinuclidine                 | C-S        |                           | N <sup>+</sup> S              | 2.906            |

**Table S2. Thermodynamic parameters of the binary and ternary *cis*-CH<sub>3</sub>SNO complexes with BH<sub>3</sub> as Lewis acid and acetate and quinuclidine as Lewis bases in  $\sigma$ -hole bound CH<sub>3</sub>SNO complexes in the gas phase; PBE0-D3BJ/def2-TZVPPD calculations.**

| Complex                                                       | N-S or C-S | LA at O or N | LB...S Interaction | LA...S Binding energy(kcal/mol) |              |            |            | LB...S Binding energy(kcal/mol) |              |            |            | Energy Enhancement |              |            |            |  |
|---------------------------------------------------------------|------------|--------------|--------------------|---------------------------------|--------------|------------|------------|---------------------------------|--------------|------------|------------|--------------------|--------------|------------|------------|--|
|                                                               |            |              |                    | $\Delta E_c$                    | $\Delta E_0$ | $\Delta H$ | $\Delta G$ | $\Delta E_c$                    | $\Delta E_0$ | $\Delta H$ | $\Delta G$ | $\Delta E_c$       | $\Delta E_0$ | $\Delta H$ | $\Delta G$ |  |
| <i>cis</i> -CH <sub>3</sub> SNO-BH <sub>3</sub>               |            | O            |                    | -16.39                          | -12.83       | -35.91     | -24.30     |                                 |              |            |            |                    |              |            |            |  |
| <i>cis</i> -CH <sub>3</sub> SNO-BH <sub>3</sub>               |            | N            |                    | -31.05                          | -27.06       | -50.22     | -38.80     |                                 |              |            |            |                    |              |            |            |  |
| <i>cis</i> -CH <sub>3</sub> SNO-acetate                       | N-S        |              | O...S              |                                 |              |            |            | -14.81                          | -13.90       | -13.42     | -4.46      |                    |              |            |            |  |
| <i>cis</i> -CH <sub>3</sub> SNO-acetate                       | C-S        |              | O...S              |                                 |              |            |            | -5.27                           | -4.49        | -4.16      | +6.31      |                    |              |            |            |  |
| <i>cis</i> -CH <sub>3</sub> SNO-quinuclidine                  | N-S        |              | N...S              |                                 |              |            |            | -4.56                           | -3.98        | -3.21      | 4.54       |                    |              |            |            |  |
| <i>cis</i> -CH <sub>3</sub> SNO-quinuclidine                  | C-S        |              | N...S              |                                 |              |            |            | -3.83                           | -3.24        | -2.55      | 6.24       |                    |              |            |            |  |
| <i>cis</i> -CH <sub>3</sub> SNO-BH <sub>3</sub> -acetate      | N-S        | O            | O...S              | -30.69                          | -26.72       | -49.97     | -37.59     | -29.11                          | -27.79       | -27.48     | -17.75     | -14.30             | -13.89       | -14.06     | -13.29     |  |
| <i>cis</i> -CH <sub>3</sub> SNO-BH <sub>3</sub> -acetate      | C-S        | O            | O...S              | -26.82                          | -22.97       | -46.20     | -33.95     | -15.70                          | -14.63       | -14.44     | -3.34      | -10.43             | -10.14       | -10.28     | -9.65      |  |
| <i>cis</i> -CH <sub>3</sub> SNO-BH <sub>3</sub> -acetate      | N-S        | N            | O...S              | -42.10                          | -37.57       | -61.03     | -47.44     | -25.87                          | -24.40       | -24.23     | -13.10     | -11.06             | -10.51       | -10.81     | -8.64      |  |
| <i>cis</i> -CH <sub>3</sub> SNO-BH <sub>3</sub> -quinuclidine | N-S        | O            | N...S              | -19.36                          | -15.61       | -38.72     | -26.96     | -7.53                           | -6.76        | -6.01      | 1.87       | -2.97              | -2.78        | -2.80      | -2.66      |  |
| <i>cis</i> -CH <sub>3</sub> SNO-BH <sub>3</sub> -quinuclidine | C-S        | O            | N...S              | -19.47                          | -15.63       | -38.82     | -26.39     | -6.91                           | -6.03        | -5.46      | 4.15       | -3.08              | -2.80        | -2.91      | -2.09      |  |
| <i>cis</i> -CH <sub>3</sub> SNO-BH <sub>3</sub> -quinuclidine | N-S        | N            | N...S              | -34.02                          | -29.80       | -53.04     | -40.81     | -7.54                           | -6.72        | -6.03      | 2.52       | -2.98              | -2.74        | -2.81      | -2.02      |  |

**Table S3. LA–S intermolecular bond lengths in  $\sigma$ -hole bound CH<sub>3</sub>SNO complexes (in Å).**

| Complex                                                       | N-S or<br>C-S | BH <sub>3</sub> at<br>O or N | $r(\text{B}-X)$ |
|---------------------------------------------------------------|---------------|------------------------------|-----------------|
| <i>cis</i> -CH <sub>3</sub> SNO-BH <sub>3</sub>               |               | O                            | 1.586           |
| <i>cis</i> -CH <sub>3</sub> SNO-BH <sub>3</sub>               |               | N                            | 1.557           |
| <i>cis</i> -CH <sub>3</sub> SNO-BH <sub>3</sub> -acetate      | N-S           | O                            | 1.569           |
| <i>cis</i> -CH <sub>3</sub> SNO-BH <sub>3</sub> -acetate      | C-S           | O                            | 1.575           |
| <i>cis</i> -CH <sub>3</sub> SNO-BH <sub>3</sub> -acetate      | N-S           | N                            | 1.568           |
| <i>cis</i> -CH <sub>3</sub> SNO-BH <sub>3</sub> -quinuclidine | N-S           | O                            | 1.581           |
| <i>cis</i> -CH <sub>3</sub> SNO-BH <sub>3</sub> -quinuclidine | C-S           | O                            | 1.586           |
| <i>cis</i> -CH <sub>3</sub> SNO-BH <sub>3</sub> -quinuclidine | N-S           | N                            | 1.559           |

## PCM( $\epsilon=4.2$ )

**Table S4. Thermodynamic parameters of the binary and ternary *cis*-CH<sub>3</sub>SNO complexes with borane as Lewis acid and acetate and quinuclidine as Lewis bases in diethylether; PBE0-D3BJ-PCM( $\epsilon=4.2$ )/def2-TZVPPD calculations.**

| Complex                                                       | N-S or C-S | LA at O or N | LB...S Interaction | LA...S Binding (kcal/mol) |              |            |            | LB...S Binding energy(kcal/mol) |              |            |            | Binding Enhancement |              |            |            |   |
|---------------------------------------------------------------|------------|--------------|--------------------|---------------------------|--------------|------------|------------|---------------------------------|--------------|------------|------------|---------------------|--------------|------------|------------|---|
|                                                               |            |              |                    | $\Delta E_c$              | $\Delta E_0$ | $\Delta H$ | $\Delta G$ | $\Delta E_c$                    | $\Delta E_0$ | $\Delta H$ | $\Delta G$ | $\Delta E_c$        | $\Delta E_0$ | $\Delta H$ | $\Delta G$ |   |
| <i>cis</i> -CH <sub>3</sub> SNO-BH <sub>3</sub>               |            | O            |                    | -20.54                    | -16.77       | -17.99     | -7.26      |                                 |              |            |            |                     |              |            |            |   |
| <i>cis</i> -CH <sub>3</sub> SNO-BH <sub>3</sub>               |            | N            |                    | -33.19                    | -28.99       | -30.30     | -19.47     |                                 |              |            |            |                     |              |            |            |   |
| <i>cis</i> -CH <sub>3</sub> SNO-acetate                       | N-S        |              | O...S              |                           |              |            |            | -4.36                           | -3.30        | -2.91      | 6.67       |                     |              |            |            |   |
| <i>cis</i> -CH <sub>3</sub> SNO-acetate                       | C-S        |              | O...S              | -                         | -            | -          | -          | -                               | -            | -          | -          | -                   | -            | -          | -          | - |
| <i>cis</i> -CH <sub>3</sub> SNO-quinuclidine                  | N-S        |              | N...S              |                           |              |            |            | -4.15                           | -3.46        | -2.78      | 5.59       |                     |              |            |            |   |
| <i>cis</i> -CH <sub>3</sub> SNO-quinuclidine                  | C-S        |              | N...S              |                           |              |            |            | -2.89                           | -2.33        | -1.67      | 7.17       |                     |              |            |            |   |
| <i>cis</i> -CH <sub>3</sub> SNO-BH <sub>3</sub> -acetate      | N-S        | O            | O...S              | -27.58                    | -23.71       | -25.00     | -13.62     | -11.40                          | -10.24       | -9.92      | 0.31       | -7.03               | -6.94        | -7.01      | -6.37      |   |
| <i>cis</i> -CH <sub>3</sub> SNO-BH <sub>3</sub> -acetate      | C-S        | O            | O...S              | -                         | -            | -          | -          | -3.98                           | -3.08        | -2.71      | 7.41       | -                   | -            | -          | -          |   |
| <i>cis</i> -CH <sub>3</sub> SNO-BH <sub>3</sub> -acetate      | N-S        | N            | O...S              | -39.20                    | -30.78       | -33.16     | -18.68     | -10.36                          | -5.09        | -5.77      | 7.47       | -6.00               | -1.79        | -2.86      | 0.80       |   |
| <i>cis</i> -CH <sub>3</sub> SNO-BH <sub>3</sub> -quinuclidine | N-S        | O            | N...S              | -23.24                    | -19.35       | -20.53     | -9.87      | -6.84                           | -6.04        | -5.33      | 2.98       | -2.69               | -2.58        | -2.54      | -2.61      |   |
| <i>cis</i> -CH <sub>3</sub> SNO-BH <sub>3</sub> -quinuclidine | C-S        | O            | N...S              | -22.67                    | -18.75       | -20.01     | -8.70      | -5.01                           | -4.32        | -3.70      | 5.72       | -2.12               | -1.98        | -2.03      | -1.45      |   |
| <i>cis</i> -CH <sub>3</sub> SNO-BH <sub>3</sub> -quinuclidine | N-S        | N            | N...S              | -36.13                    | -31.74       | -33.07     | -21.65     | -7.09                           | -6.21        | -5.55      | 3.41       | -2.93               | -2.75        | -2.77      | -2.17      |   |

**Table S5. Effect of a polarizable environment: S–N bond properties in  $\sigma$ -hole bound CH<sub>3</sub>SNO complexes.**

| Complex                                                       | BH <sub>3</sub> at O or N | N-S or C-S | $r(\text{S-N})$ | $\Delta r(\text{S-N})$ |
|---------------------------------------------------------------|---------------------------|------------|-----------------|------------------------|
| <i>cis</i> -CH <sub>3</sub> SNO                               |                           |            | 1.757           |                        |
| <i>cis</i> -CH <sub>3</sub> SNO-quinuclidine                  |                           | N-S        | 1.731           | -0.026                 |
| <i>cis</i> -CH <sub>3</sub> SNO-acetate                       |                           | N-S        | 1.705           | -0.052                 |
| <i>cis</i> -CH <sub>3</sub> SNO-quinuclidine                  |                           | C-S        | 1.749           | -0.008                 |
| <i>cis</i> -CH <sub>3</sub> SNO-BH <sub>3</sub>               | O                         |            | 1.634           | -0.124                 |
| <i>cis</i> -CH <sub>3</sub> SNO-BH <sub>3</sub> -quinuclidine | O                         | N-S        | 1.635           | -0.122                 |
| <i>cis</i> -CH <sub>3</sub> SNO-BH <sub>3</sub> -acetate      | O                         | N-S        | 1.630           | -0.127                 |
| <i>cis</i> -CH <sub>3</sub> SNO-BH <sub>3</sub> -quinuclidine | O                         | C-S        | 1.639           | -0.118                 |
| <i>cis</i> -CH <sub>3</sub> SNO-BH <sub>3</sub> -acetate      | O                         | C-S        | 1.634           | -0.123                 |
| <i>cis</i> -CH <sub>3</sub> SNO-BH <sub>3</sub>               | N                         |            | 1.698           | -0.059                 |
| <i>cis</i> -CH <sub>3</sub> SNO-BH <sub>3</sub> -quinuclidine | N                         | N-S        | 1.707           | -0.050                 |
| <i>cis</i> -CH <sub>3</sub> SNO-BH <sub>3</sub> -acetate      | N                         | N-S        | 1.701           | -0.056                 |

**Table S6. LB–S intermolecular bond lengths in  $\sigma$ -hole bound CH<sub>3</sub>SNO complexes (in Å); PBE0-D3BJ-PCM( $\epsilon$ =4.2)/def2-TZVPPD calculations.**

| Complex                                                       | N-S or C-S | BH <sub>3</sub> at O or N | LB $\cdots$ S Interaction | $r(Y\cdots S)$ |
|---------------------------------------------------------------|------------|---------------------------|---------------------------|----------------|
| <i>cis</i> -CH <sub>3</sub> SNO-acetate                       | N-S        |                           | O $\cdots$ S              | 2.790          |
| <i>cis</i> -CH <sub>3</sub> SNO-quinuclidine                  | N-S        |                           | O $\cdots$ S              | 2.940          |
| <i>cis</i> -CH <sub>3</sub> SNO-quinuclidine                  | C-S        |                           | O $\cdots$ S              | 2.889          |
| <i>cis</i> -CH <sub>3</sub> SNO-BH <sub>3</sub> -acetate      | N-S        | O                         | O $\cdots$ S              | 2.539          |
| <i>cis</i> -CH <sub>3</sub> SNO-BH <sub>3</sub> -acetate      | C-S        | O                         | O $\cdots$ S              | 2.684          |
| <i>cis</i> -CH <sub>3</sub> SNO-BH <sub>3</sub> -acetate      | N-S        | N                         | O $\cdots$ S              | 2.492          |
| <i>cis</i> -CH <sub>3</sub> SNO-BH <sub>3</sub> -quinuclidine | N-S        | O                         | N $\cdots$ S              | 2.768          |
| <i>cis</i> -CH <sub>3</sub> SNO-BH <sub>3</sub> -quinuclidine | C-S        | O                         | N $\cdots$ S              | 2.780          |
| <i>cis</i> -CH <sub>3</sub> SNO-BH <sub>3</sub> -quinuclidine | N-S        | N                         | N $\cdots$ S              | 2.701          |

**Table S7. BH<sub>3</sub>–RSNO intermolecular bond lengths in  $\sigma$ -hole bound CH<sub>3</sub>SNO complexes (in Å); PBE0-D3BJ-PCM( $\epsilon$ =4.2)/def2-TZVPPD calculations.**

| Complex                                                       | N-S or C-S | BH <sub>3</sub> at O or N | $r(\text{B-X})$ |
|---------------------------------------------------------------|------------|---------------------------|-----------------|
| <i>cis</i> -CH <sub>3</sub> SNO-BH <sub>3</sub>               |            | O                         | 1.577           |
| <i>cis</i> -CH <sub>3</sub> SNO-BH <sub>3</sub>               |            | N                         | 1.564           |
| <i>cis</i> -CH <sub>3</sub> SNO-BH <sub>3</sub> -acetate      | N-S        | O                         | 1.564           |
| <i>cis</i> -CH <sub>3</sub> SNO-BH <sub>3</sub> -acetate      | C-S        | O                         | 1.571           |
| <i>cis</i> -CH <sub>3</sub> SNO-BH <sub>3</sub> -acetate      | N-S        | N                         | 1.568           |
| <i>cis</i> -CH <sub>3</sub> SNO-BH <sub>3</sub> -quinuclidine | N-S        | O                         | 1.571           |
| <i>cis</i> -CH <sub>3</sub> SNO-BH <sub>3</sub> -quinuclidine | C-S        | O                         | 1.574           |
| <i>cis</i> -CH <sub>3</sub> SNO-BH <sub>3</sub> -quinuclidine | N-S        | N                         | 1.565           |

**Table S8. Thermodynamic parameters of the binary and ternary CH<sub>3</sub>SNO complexes with Arg<sup>+</sup>, His<sup>+</sup>, Lys<sup>+</sup> and Asp<sup>0</sup>/Glu<sup>0</sup> models as Lewis acid and His<sup>0</sup> and Asp<sup>-</sup>/Glu<sup>-</sup> models as Lewis bases; PBE0-D3BJ-PCM( $\epsilon=4.2$ )/def2-TZVPPD calculations.**

| Complex                                                                                                | N-S or C-S | LA at O or N | LB...S Interaction | LA...O or N Binding energy(kcal/mol) |              |            |            | LB...S Binding energy(kcal/mol) |              |            |            | Enhancement  |              |            |            |  |  |
|--------------------------------------------------------------------------------------------------------|------------|--------------|--------------------|--------------------------------------|--------------|------------|------------|---------------------------------|--------------|------------|------------|--------------|--------------|------------|------------|--|--|
|                                                                                                        |            |              |                    | $\Delta E_e$                         | $\Delta E_0$ | $\Delta H$ | $\Delta G$ | $\Delta E_e$                    | $\Delta E_0$ | $\Delta H$ | $\Delta G$ | $\Delta E_e$ | $\Delta E_0$ | $\Delta H$ | $\Delta G$ |  |  |
| <i>cis</i> -CH <sub>3</sub> SNO-Arg <sup>+</sup>                                                       |            | O,N          |                    | -9.14                                | -8.21        | -7.85      | +1.80      |                                 |              |            |            |              |              |            |            |  |  |
| <i>cis</i> -CH <sub>3</sub> SNO-His <sup>+</sup>                                                       |            | O            |                    | -8.13                                | -7.29        | -6.93      | +2.66      |                                 |              |            |            |              |              |            |            |  |  |
| <i>cis</i> -CH <sub>3</sub> SNO-His <sup>+</sup>                                                       |            | N            |                    | -7.60                                | -6.71        | -6.35      | +3.47      |                                 |              |            |            |              |              |            |            |  |  |
| <i>cis</i> -CH <sub>3</sub> SNO-Lys <sup>+</sup>                                                       |            | O            |                    | -8.89                                | -7.65        | -7.72      | +2.46      |                                 |              |            |            |              |              |            |            |  |  |
| <i>cis</i> -CH <sub>3</sub> SNO-Lys <sup>+</sup>                                                       |            | N            |                    | -8.35                                | -7.15        | -7.08      | +2.34      |                                 |              |            |            |              |              |            |            |  |  |
| <i>cis</i> -CH <sub>3</sub> SNO-Asp <sup>0</sup> /Glu <sup>0</sup>                                     |            | O            |                    | -4.58                                | -3.79        | -3.27      | +4.80      |                                 |              |            |            |              |              |            |            |  |  |
| <i>cis</i> -CH <sub>3</sub> SNO-Asp <sup>0</sup> /Glu <sup>0</sup>                                     |            | N            |                    | -5.63                                | -4.67        | -4.27      | +5.11      |                                 |              |            |            |              |              |            |            |  |  |
| <i>cis</i> -CH <sub>3</sub> SNO-Asp <sup>-</sup> /Glu <sup>-</sup>                                     | N-S        |              | O...S              |                                      |              |            |            | -4.34                           | -3.28        | -2.89      | +6.70      |              |              |            |            |  |  |
| <i>cis</i> -CH <sub>3</sub> SNO-His <sup>0</sup>                                                       | N-S        |              | N...S              |                                      |              |            |            | -2.40                           | -2.03        | -1.15      | +4.53      |              |              |            |            |  |  |
| <i>cis</i> -CH <sub>3</sub> SNO-Arg <sup>+</sup> -Asp <sup>-</sup> /Glu <sup>-</sup>                   | N-S        | O,N          | O...S              | -22.26                               | -21.30       | -21.09     | -10.79     | -17.46                          | -16.37       | -16.13     | -5.89      | -13.12       | -13.09       | -13.24     | -12.59     |  |  |
| <i>cis</i> -CH <sub>3</sub> SNO-His <sup>+</sup> -Asp <sup>-</sup> /Glu <sup>-</sup>                   | N-S        | O            | O...S              | -20.70                               | -20.19       | -19.82     | -9.96      | -16.91                          | -16.18       | -15.78     | -5.91      | -12.57       | -12.89       | -12.89     | -12.61     |  |  |
| <i>cis</i> -CH <sub>3</sub> SNO-Lys <sup>+</sup> -Asp <sup>-</sup> /Glu <sup>-</sup>                   | N-S        | O            | O...S              | -22.36                               | -21.63       | -21.63     | -11.57     | -17.81                          | -17.26       | -16.81     | -7.33      | -13.47       | -13.98       | -13.91     | -14.03     |  |  |
| <i>cis</i> -CH <sub>3</sub> SNO-Asp <sup>0</sup> /Glu <sup>0</sup> -Asp <sup>-</sup> /Glu <sup>-</sup> | N-S        | O            | O...S              | -7.37                                | -6.55        | -6.16      | +3.20      | -7.13                           | -6.04        | -5.79      | +5.10      | -2.79        | -2.76        | -2.89      | -1.60      |  |  |
| <i>cis</i> -CH <sub>3</sub> SNO-Asp <sup>0</sup> /Glu <sup>0</sup> -Asp <sup>-</sup> /Glu <sup>-</sup> | N-S        | N            | O...S              | -7.39                                | -6.49        | -6.15      | +3.62      | -6.10                           | -5.11        | -4.77      | +5.22      | -1.76        | -2.76        | -1.88      | -1.49      |  |  |
| <i>cis</i> -CH <sub>3</sub> SNO-Arg <sup>+</sup> -His <sup>0</sup>                                     | N-S        | O,N          | N...S              | -11.75                               | -10.04       | -10.18     | +3.66      | -5.02                           | -3.85        | -3.47      | +6.39      | -2.62        | -1.82        | -2.32      | +1.86      |  |  |
| <i>cis</i> -CH <sub>3</sub> SNO-His <sup>+</sup> -His <sup>0</sup>                                     | N-S        | O            | N...S              | -10.72                               | -9.69        | -9.49      | +2.36      | -5.00                           | -4.43        | -3.71      | +4.23      | -2.60        | -2.40        | -2.56      | -0.30      |  |  |
| <i>cis</i> -CH <sub>3</sub> SNO-His <sup>+</sup> -His <sup>0</sup>                                     | N-S        | N            | N...S              | -10.05                               | -8.87        | -8.70      | +3.66      | -4.86                           | -4.19        | -3.50      | +4.73      | -2.45        | -2.16        | -2.35      | +0.19      |  |  |
| <i>cis</i> -CH <sub>3</sub> SNO-Lys <sup>+</sup> -His <sup>0</sup>                                     | N-S        | O            | N...S              | -11.80                               | -10.50       | -10.71     | +1.57      | -5.32                           | -4.88        | -4.14      | +3.64      | -2.92        | -2.85        | -2.98      | -0.89      |  |  |
| <i>trans</i> -CH <sub>3</sub> SNO-Arg <sup>+</sup>                                                     |            | O,N          |                    | -7.84                                | -6.53        | -6.31      | +3.70      |                                 |              |            |            |              |              |            |            |  |  |
| <i>trans</i> -CH <sub>3</sub> SNO-His <sup>+</sup>                                                     |            | O            |                    | -7.38                                | -6.79        | -6.27      | +2.20      |                                 |              |            |            |              |              |            |            |  |  |
| <i>trans</i> -CH <sub>3</sub> SNO-His <sup>+</sup>                                                     |            | N            |                    | -6.21                                | -5.25        | -4.84      | +4.59      |                                 |              |            |            |              |              |            |            |  |  |
| <i>trans</i> -CH <sub>3</sub> SNO-Lys <sup>+</sup>                                                     |            | O            |                    | -8.22                                | -7.22        | -7.08      | +2.06      |                                 |              |            |            |              |              |            |            |  |  |
| <i>trans</i> -CH <sub>3</sub> SNO-Lys <sup>+</sup>                                                     |            | N            |                    | -6.36                                | -4.59        | -4.73      | +5.50      |                                 |              |            |            |              |              |            |            |  |  |
| <i>trans</i> -CH <sub>3</sub> SNO-Asp <sup>0</sup> /Glu <sup>0</sup>                                   |            | O            |                    | -4.31                                | -3.53        | -3.01      | +5.11      |                                 |              |            |            |              |              |            |            |  |  |
| <i>trans</i> -CH <sub>3</sub> SNO-Asp <sup>0</sup> /Glu <sup>0</sup>                                   |            | N            |                    | -5.41                                | -4.46        | -4.05      | +4.75      |                                 |              |            |            |              |              |            |            |  |  |
| <i>trans</i> -CH <sub>3</sub> SNO-Asp <sup>-</sup> /Glu <sup>-</sup>                                   | N-S        |              | O...S              | -4.34                                |              |            |            |                                 |              |            |            | -3.44        | -2.97        | +6.05      |            |  |  |

| Complex                                                                                                  | N-S or C-S | LA at O or N | LB...S Interaction | LA...O or N Binding energy(kcal/mol) |              |            |            | LB...S Binding energy(kcal/mol) |              |            |            | Enhancement  |              |            |            |
|----------------------------------------------------------------------------------------------------------|------------|--------------|--------------------|--------------------------------------|--------------|------------|------------|---------------------------------|--------------|------------|------------|--------------|--------------|------------|------------|
|                                                                                                          |            |              |                    | $\Delta E_c$                         | $\Delta E_0$ | $\Delta H$ | $\Delta G$ | $\Delta E_c$                    | $\Delta E_0$ | $\Delta H$ | $\Delta G$ | $\Delta E_c$ | $\Delta E_0$ | $\Delta H$ | $\Delta G$ |
| <i>trans</i> -CH <sub>3</sub> SNO-His <sup>0</sup>                                                       | N-S        |              | N...S              | -2.42                                |              |            |            |                                 | -1.92        | -1.14      | +5.64      |              |              |            |            |
| <i>trans</i> -CH <sub>3</sub> SNO-Arg <sup>+</sup> -Asp <sup>-</sup> /Glu <sup>-</sup>                   | N-S        | O,N          | O...S              | -21.16                               | -19.97       | -19.87     | -8.75      | -17.66                          | -16.88       | -16.53     | -6.39      | -13.32       | -13.44       | -13.56     | -12.45     |
| <i>trans</i> -CH <sub>3</sub> SNO-His <sup>+</sup> -Asp <sup>-</sup> /Glu <sup>-</sup>                   | N-S        | O            | O...S              | -19.72                               | -19.11       | -18.88     | -8.52      | -16.68                          | -15.76       | -15.58     | -4.67      | -12.34       | -12.32       | -12.61     | -10.72     |
| <i>trans</i> -CH <sub>3</sub> SNO-His <sup>+</sup> -Asp <sup>-</sup> /Glu <sup>-</sup>                   | N-S        | N            | O...S              | -19.08                               | -18.20       | -18.01     | -7.22      | -17.21                          | -16.36       | -16.14     | -5.75      | -12.87       | -12.95       | -13.17     | -11.81     |
| <i>trans</i> -CH <sub>3</sub> SNO-Lys <sup>+</sup> -Asp <sup>-</sup> /Glu <sup>-</sup>                   | N-S        | O            | O...S              | -21.69                               | -20.82       | -20.95     | -10.25     | -17.81                          | -17.04       | -16.84     | -6.26      | -13.47       | -13.60       | -13.87     | -12.31     |
| <i>trans</i> -CH <sub>3</sub> SNO-Lys <sup>+</sup> -Asp <sup>-</sup> /Glu <sup>-</sup>                   | N-S        | N            | O...S              | -20.60                               | -19.14       | -19.49     | -7.35      | -18.57                          | -17.99       | -17.74     | -6.80      | -14.24       | -14.55       | -14.77     | -12.86     |
| <i>trans</i> -CH <sub>3</sub> SNO-Asp <sup>0</sup> /Glu <sup>0</sup> -Asp <sup>-</sup> /Glu <sup>-</sup> | N-S        | O            | O...S              | -6.63                                | -5.46        | -5.26      | +5.55      | -6.66                           | -5.36        | -5.22      | +6.50      | -2.35        | -1.93        | -2.25      | +0.44      |
| <i>trans</i> -CH <sub>3</sub> SNO-Asp <sup>0</sup> /Glu <sup>0</sup> -Asp <sup>-</sup> /Glu <sup>-</sup> | N-S        | N            | O...S              | -7.09                                | -6.15        | -5.80      | +4.34      | -6.02                           | -5.12        | -4.72      | +5.65      | -1.69        | -1.68        | -1.75      | -0.41      |
| <i>trans</i> -CH <sub>3</sub> SNO-Arg <sup>+</sup> -His <sup>0</sup>                                     | N-S        | O,N          | N...S              | -11.19                               | -9.42        | -9.55      | +3.61      | -5.77                           | -4.81        | -4.37      | +5.55      | -3.36        | -2.90        | -3.24      | -0.09      |
| <i>trans</i> -CH <sub>3</sub> SNO-His <sup>+</sup> -His <sup>0</sup>                                     | N-S        | O            | N...S              | -10.31                               | -9.34        | -9.15      | +2.41      | -5.34                           | -4.47        | -4.01      | +5.84      | -2.93        | -2.56        | -2.88      | +0.21      |
| <i>trans</i> -CH <sub>3</sub> SNO-His <sup>+</sup> -His <sup>0</sup>                                     | N-S        | N            | N...S              | -9.26                                | -7.95        | -7.79      | +4.20      | -5.47                           | -4.61        | -4.08      | +5.25      | -3.05        | -2.70        | -2.95      | -0.39      |
| <i>trans</i> -CH <sub>3</sub> SNO-Lys <sup>+</sup> -His <sup>0</sup>                                     | N-S        | O            | N...S              | -11.45                               | -10.06       | -10.26     | +1.70      | -5.64                           | -4.75        | -4.32      | +5.28      | -3.23        | -2.84        | -3.18      | -0.36      |
| <i>trans</i> -CH <sub>3</sub> SNO-Lys <sup>+</sup> -His <sup>0</sup>                                     | N-S        | N            | N...S              | -9.84                                | -7.98        | -8.32      | +4.63      | -5.90                           | -5.30        | -4.73      | +4.77      | -3.48        | -3.38        | -3.59      | -0.87      |

**Table S9. CH<sub>3</sub>SNO S–N bond lengths and bond length changes upon complexation in  $\sigma$ -hole bound CH<sub>3</sub>SNO complexes (in Å); PBE0- D3BJ-PCM( $\epsilon=4.2$ )/def2-TZVPPD calculations.**

| Complex                                                                                                    | LA at<br>O or N | N-S or<br>C-S | $r(\text{S-N})$ | $\Delta r(\text{S-N})$ |
|------------------------------------------------------------------------------------------------------------|-----------------|---------------|-----------------|------------------------|
| <i>cis</i> -CH <sub>3</sub> SNO                                                                            |                 |               | 1.757           |                        |
| <i>cis</i> -CH <sub>3</sub> SNO-Asp <sup>-</sup> /Glu <sup>-</sup>                                         |                 | N-S           | 1.705           | -0.052                 |
| <i>cis</i> -CH <sub>3</sub> SNO-His <sup>0</sup>                                                           |                 | N-S           | 1.732           | -0.026                 |
| <i>cis</i> -CH <sub>3</sub> SNO- Arg <sup>+</sup>                                                          | O,N             |               | 1.675           | -0.082                 |
| <i>cis</i> -CH <sub>3</sub> SNO-His <sup>+</sup>                                                           | O               |               | 1.670           | -0.087                 |
| <i>cis</i> -CH <sub>3</sub> SNO-His <sup>+</sup>                                                           | N               |               | 1.701           | -0.056                 |
| <i>cis</i> -CH <sub>3</sub> SNO-Lys <sup>+</sup>                                                           | O               |               | 1.666           | -0.092                 |
| <i>cis</i> -CH <sub>3</sub> SNO-Lys <sup>+</sup>                                                           | N               |               | 1.698           | -0.059                 |
| <i>cis</i> -CH <sub>3</sub> SNO-Asp <sup>0</sup> /Glu <sup>0</sup>                                         | O               |               | 1.694           | -0.073                 |
| <i>cis</i> -CH <sub>3</sub> SNO-Asp <sup>0</sup> /Glu <sup>0</sup>                                         | N               |               | 1.714           | -0.053                 |
| <i>cis</i> -CH <sub>3</sub> SNO-Arg <sup>+</sup> -Asp <sup>-</sup> /Glu <sup>-</sup>                       | O,N             | N-S           | 1.657           | -0.101                 |
| <i>cis</i> -CH <sub>3</sub> SNO-His <sup>+</sup> -Asp <sup>-</sup> /Glu <sup>-</sup>                       | O               | N-S           | 1.644           | -0.113                 |
| <i>cis</i> -CH <sub>3</sub> SNO-Lys <sup>+</sup> -Asp <sup>-</sup> /Glu <sup>-</sup>                       | O               | N-S           | 1.644           | -0.113                 |
| <i>cis</i> -CH <sub>3</sub> SNO- Asp <sup>0</sup> /Glu <sup>0</sup> – Asp <sup>-</sup> /Glu <sup>-</sup>   | O               | N-S           | 1.666           | -0.101                 |
| <i>cis</i> -CH <sub>3</sub> SNO- Asp <sup>0</sup> /Glu <sup>0</sup> - Asp <sup>-</sup> /Glu <sup>-</sup>   | N               | N-S           | 1.687           | -0.080                 |
| <i>cis</i> -CH <sub>3</sub> SNO-Arg <sup>+</sup> -His <sup>0</sup>                                         | N,O             | N-S           | 1.667           | -0.100                 |
| <i>cis</i> -CH <sub>3</sub> SNO-His <sup>+</sup> -His <sup>0</sup>                                         | N               | N-S           | 1.686           | -0.071                 |
| <i>cis</i> -CH <sub>3</sub> SNO-His <sup>+</sup> -His <sup>0</sup>                                         | O               | N-S           | 1.658           | -0.099                 |
| <i>cis</i> -CH <sub>3</sub> SNO-Lys <sup>+</sup> -His <sup>0</sup>                                         | O               | N-S           | 1.653           | -0.114                 |
| <i>trans</i> -CH <sub>3</sub> SNO                                                                          |                 |               | 1.767           |                        |
| <i>trans</i> -CH <sub>3</sub> SNO- Asp <sup>-</sup> /Glu <sup>-</sup>                                      |                 | N-S           | 1.727           | -0.040                 |
| <i>trans</i> -CH <sub>3</sub> SNO-His <sup>0</sup>                                                         |                 | N-S           | 1.746           | -0.022                 |
| <i>trans</i> -CH <sub>3</sub> SNO-Arg <sup>+</sup>                                                         | N,O             |               | 1.697           | -0.070                 |
| <i>trans</i> -CH <sub>3</sub> SNO-His <sup>+</sup>                                                         | O               |               | 1.694           | -0.073                 |
| <i>trans</i> -CH <sub>3</sub> SNO-His <sup>+</sup>                                                         | N               |               | 1.710           | -0.057                 |
| <i>trans</i> -CH <sub>3</sub> SNO-Lys <sup>+</sup>                                                         | O               |               | 1.687           | -0.080                 |
| <i>trans</i> -CH <sub>3</sub> SNO-Lys <sup>+</sup>                                                         | N               |               | 1.712           | -0.055                 |
| <i>trans</i> -CH <sub>3</sub> SNO- Asp <sup>0</sup> /Glu <sup>0</sup>                                      | O               |               | 1.718           | -0.050                 |
| <i>trans</i> -CH <sub>3</sub> SNO- Asp <sup>0</sup> /Glu <sup>0</sup>                                      | N               |               | 1.727           | -0.040                 |
| <i>trans</i> -CH <sub>3</sub> SNO-Arg <sup>+</sup> - Asp <sup>-</sup> /Glu <sup>-</sup>                    | N,O             | N-S           | 1.681           | -0.086                 |
| <i>trans</i> -CH <sub>3</sub> SNO-His <sup>+</sup> - Asp <sup>-</sup> /Glu <sup>-</sup>                    | O               | N-S           | 1.669           | -0.099                 |
| <i>trans</i> -CH <sub>3</sub> SNO-His <sup>+</sup> - Asp <sup>-</sup> /Glu <sup>-</sup>                    | N               | N-S           | 1.694           | -0.074                 |
| <i>trans</i> -CH <sub>3</sub> SNO-Lys <sup>+</sup> - Asp <sup>-</sup> /Glu <sup>-</sup>                    | O               | N-S           | 1.665           | -0.102                 |
| <i>trans</i> -CH <sub>3</sub> SNO-Lys <sup>+</sup> - Asp <sup>-</sup> /Glu <sup>-</sup>                    | N               | N-S           | 1.695           | -0.072                 |
| <i>trans</i> -CH <sub>3</sub> SNO- Asp <sup>0</sup> /Glu <sup>0</sup> - Asp <sup>-</sup> /Glu <sup>-</sup> | O               | N-S           | 1.688           | -0.080                 |
| <i>trans</i> -CH <sub>3</sub> SNO- Asp <sup>0</sup> /Glu <sup>0</sup> - Asp <sup>-</sup> /Glu <sup>-</sup> | N               | N-S           | 1.702           | -0.066                 |
| <i>trans</i> -CH <sub>3</sub> SNO-Arg <sup>+</sup> -His <sup>0</sup>                                       | N,O             | N-S           | 1.685           | -0.083                 |
| <i>trans</i> -CH <sub>3</sub> SNO-His <sup>+</sup> -His <sup>0</sup>                                       | O               | N-S           | 1.679           | -0.088                 |
| <i>trans</i> -CH <sub>3</sub> SNO-His <sup>+</sup> -His <sup>0</sup>                                       | N               | N-S           | 1.698           | -0.070                 |
| <i>trans</i> -CH <sub>3</sub> SNO-Lys <sup>+</sup> -His <sup>0</sup>                                       | O               | N-S           | 1.674           | -0.094                 |
| <i>trans</i> -CH <sub>3</sub> SNO-Lys <sup>+</sup> -His <sup>0</sup>                                       | N               | N-S           | 1.696           | -0.071                 |



**Table S10. LB-S intermolecular bond lengths in  $\sigma$ -hole bound CH<sub>3</sub>SNO complexes (in Å); PBE0-D3BJ-PCM( $\epsilon=4.2$ )/def2-TZVPPD calculations.**

| Complex                                                                                                  | N-S or C-S | LA at O or N | LB-S Interaction  | $r(Y\cdots S)$ |
|----------------------------------------------------------------------------------------------------------|------------|--------------|-------------------|----------------|
| <i>cis</i> -CH <sub>3</sub> SNO- Asp <sup>-</sup> /Glu <sup>-</sup>                                      | N-S        |              | O <sup>-</sup> ⋯S | 2.790          |
| <i>cis</i> -CH <sub>3</sub> SNO-His <sup>0</sup>                                                         | N-S        |              | N <sup>0</sup> ⋯S | 3.252          |
| <i>cis</i> -CH <sub>3</sub> SNO-Arg <sup>+</sup> - Asp <sup>-</sup> /Glu <sup>-</sup>                    | N-S        | O,N          | O <sup>-</sup> ⋯S | 2.539          |
| <i>cis</i> -CH <sub>3</sub> SNO-His <sup>+</sup> - Asp <sup>-</sup> /Glu <sup>-</sup>                    | N-S        | O            | O <sup>-</sup> ⋯S | 2.585          |
| <i>cis</i> -CH <sub>3</sub> SNO-Lys <sup>+</sup> - Asp <sup>-</sup> /Glu <sup>-</sup>                    | N-S        | O            | O <sup>-</sup> ⋯S | 2.536          |
| <i>cis</i> -CH <sub>3</sub> SNO-Asp <sup>0</sup> /Glu <sup>0</sup> -Asp <sup>-</sup> /Glu <sup>-</sup>   | N-S        | O            | O <sup>-</sup> ⋯S | 2.742          |
| <i>cis</i> -CH <sub>3</sub> SNO-Asp <sup>0</sup> /Glu <sup>0</sup> -Asp <sup>-</sup> /Glu <sup>-</sup>   | N-S        | N            | O <sup>-</sup> ⋯S | 2.732          |
| <i>cis</i> -CH <sub>3</sub> SNO-Arg <sup>+</sup> -His <sup>0</sup>                                       | N-S        | O,N          | N <sup>0</sup> ⋯S | 2.837          |
| <i>cis</i> -CH <sub>3</sub> SNO-His <sup>+</sup> -His <sup>0</sup>                                       | N-S        | N            | N <sup>0</sup> ⋯S | 3.006          |
| <i>cis</i> -CH <sub>3</sub> SNO-His <sup>+</sup> -His <sup>0</sup>                                       | N-S        | O            | N <sup>0</sup> ⋯S | 2.995          |
| <i>cis</i> -CH <sub>3</sub> SNO-Lys <sup>+</sup> -His <sup>0</sup>                                       | N-S        | O            | O <sup>-</sup> ⋯S | 2.980          |
| <i>trans</i> -CH <sub>3</sub> SNO- Asp <sup>-</sup> /Glu <sup>-</sup>                                    | N-S        |              | O <sup>-</sup> ⋯S | 2.783          |
| <i>trans</i> -CH <sub>3</sub> SNO-His <sup>0</sup>                                                       | N-S        |              | N <sup>0</sup> ⋯S | 3.153          |
| <i>trans</i> -CH <sub>3</sub> SNO-Arg <sup>+</sup> - Asp <sup>-</sup> /Glu <sup>-</sup>                  | N-S        | O,N          | O <sup>-</sup> ⋯S | 2.446          |
| <i>trans</i> -CH <sub>3</sub> SNO-His <sup>+</sup> - Asp <sup>-</sup> /Glu <sup>-</sup>                  | N-S        | O            | O <sup>-</sup> ⋯S | 2.470          |
| <i>trans</i> -CH <sub>3</sub> SNO-His <sup>+</sup> - Asp <sup>-</sup> /Glu <sup>-</sup>                  | N-S        | N            | O <sup>-</sup> ⋯S | 2.453          |
| <i>trans</i> -CH <sub>3</sub> SNO-Lys <sup>+</sup> - Asp <sup>-</sup> /Glu <sup>-</sup>                  | N-S        | O            | O <sup>-</sup> ⋯S | 2.441          |
| <i>trans</i> -CH <sub>3</sub> SNO-Lys <sup>+</sup> - Asp <sup>-</sup> /Glu <sup>-</sup>                  | N-S        | N            | O <sup>-</sup> ⋯S | 2.426          |
| <i>trans</i> -CH <sub>3</sub> SNO-Asp <sup>0</sup> /Glu <sup>0</sup> -Asp <sup>-</sup> /Glu <sup>-</sup> | N-S        | O            | O <sup>-</sup> ⋯S | 2.619          |
| <i>trans</i> -CH <sub>3</sub> SNO-Asp <sup>0</sup> /Glu <sup>0</sup> -Asp <sup>-</sup> /Glu <sup>-</sup> | N-S        | N            | O <sup>-</sup> ⋯S | 2.658          |
| <i>trans</i> -CH <sub>3</sub> SNO-Arg <sup>+</sup> -His <sup>0</sup>                                     | N-S        | O,N          | N <sup>0</sup> ⋯S | 2.821          |
| <i>trans</i> -CH <sub>3</sub> SNO-His <sup>+</sup> -His <sup>0</sup>                                     | N-S        | O            | N <sup>0</sup> ⋯S | 2.857          |
| <i>trans</i> -CH <sub>3</sub> SNO-His <sup>+</sup> -His <sup>0</sup>                                     | N-S        | N            | N <sup>0</sup> ⋯S | 2.838          |
| <i>trans</i> -CH <sub>3</sub> SNO-Lys <sup>+</sup> -His <sup>0</sup>                                     | N-S        | O            | N <sup>0</sup> ⋯S | 2.980          |
| <i>trans</i> -CH <sub>3</sub> SNO-Lys <sup>+</sup> -His <sup>0</sup>                                     | N-S        | N            | N <sup>0</sup> ⋯S | 2.807          |

**Table S11. LA-S intermolecular bond lengths in  $\sigma$ -hole bound CH<sub>3</sub>SNO complexes (in Å); PBE0-D3BJ-PCM( $\epsilon=4.2$ )/def2-TZVPPD calculations.**

| Complex                                                                                                  | N-S or C-S | LA at O or N | $r(\text{LA-X})$ |
|----------------------------------------------------------------------------------------------------------|------------|--------------|------------------|
| <i>cis</i> -CH <sub>3</sub> SNO-Arg <sup>+</sup>                                                         |            | O*,N         | 1.949            |
|                                                                                                          |            | O,N*         | 2.029            |
| <i>cis</i> -CH <sub>3</sub> SNO-His <sup>+</sup>                                                         |            | O            | 1.735            |
| <i>cis</i> -CH <sub>3</sub> SNO-His <sup>+</sup>                                                         |            | N            | 1.856            |
| <i>cis</i> -CH <sub>3</sub> SNO-Lys <sup>+</sup>                                                         |            | O            | 1.724            |
| <i>cis</i> -CH <sub>3</sub> SNO-Lys <sup>+</sup>                                                         |            | N            | 1.849            |
| <i>cis</i> -CH <sub>3</sub> SNO- Asp <sup>0</sup> /Glu <sup>0</sup>                                      |            | O            | 1.807            |
| <i>cis</i> -CH <sub>3</sub> SNO- Asp <sup>0</sup> /Glu <sup>0</sup>                                      |            | N            | 1.872            |
| <i>cis</i> -CH <sub>3</sub> SNO-Arg <sup>+</sup> - Asp <sup>-</sup> /Glu <sup>-</sup>                    | N-S        | O*,N         | 1.813            |
|                                                                                                          | N-S        | O,N*         | 1.941            |
| <i>cis</i> -CH <sub>3</sub> SNO-His <sup>+</sup> - Asp <sup>-</sup> /Glu <sup>-</sup>                    | N-S        | O            | 1.628            |
| <i>cis</i> -CH <sub>3</sub> SNO-Lys <sup>+</sup> - Asp <sup>-</sup> /Glu <sup>-</sup>                    | N-S        | O            | 1.594            |
| <i>cis</i> -CH <sub>3</sub> SNO-Asp <sup>0</sup> /Glu <sup>0</sup> -Asp <sup>-</sup> /Glu <sup>-</sup>   | N-S        | O            | 1.704            |
| <i>cis</i> -CH <sub>3</sub> SNO-Asp <sup>0</sup> /Glu <sup>0</sup> -Asp <sup>-</sup> /Glu <sup>-</sup>   | N-S        | N            | 1.808            |
| <i>cis</i> -CH <sub>3</sub> SNO-Arg <sup>+</sup> -His <sup>0</sup>                                       | N-S        | O*,N         | 1.887            |
|                                                                                                          | N-S        | O,N*         | 1.996            |
| <i>cis</i> -CH <sub>3</sub> SNO-His <sup>+</sup> -His <sup>0</sup>                                       | N-S        | N            | 1.809            |
| <i>cis</i> -CH <sub>3</sub> SNO-His <sup>+</sup> -His <sup>0</sup>                                       | N-S        | O            | 1.689            |
| <i>cis</i> -CH <sub>3</sub> SNO-Lys <sup>+</sup> -His <sup>0</sup>                                       | N-S        | O            | 1.676            |
| <i>trans</i> -CH <sub>3</sub> SNO-Arg <sup>+</sup>                                                       |            | O*,N         | 1.946            |
|                                                                                                          |            | O,N*         | 2.068            |
| <i>trans</i> -CH <sub>3</sub> SNO-His <sup>+</sup>                                                       |            | O            | 1.748            |
| <i>trans</i> -CH <sub>3</sub> SNO-His <sup>+</sup>                                                       |            | N            | 1.937            |
| <i>trans</i> -CH <sub>3</sub> SNO-Lys <sup>+</sup>                                                       |            | O            | 1.731            |
| <i>trans</i> -CH <sub>3</sub> SNO-Lys <sup>+</sup>                                                       |            | N            | 1.877            |
| <i>trans</i> -CH <sub>3</sub> SNO- Asp <sup>0</sup> /Glu <sup>0</sup>                                    | N-S        | O            | 1.825            |
| <i>trans</i> -CH <sub>3</sub> SNO- Asp <sup>0</sup> /Glu <sup>0</sup>                                    | N-S        | N            | 1.925            |
| <i>trans</i> -CH <sub>3</sub> SNO-Arg <sup>+</sup> - Asp <sup>-</sup> /Glu <sup>-</sup>                  | N-S        | O*,N         | 1.823            |
|                                                                                                          | N-S        | O,N*         | 1.933            |
| <i>trans</i> -CH <sub>3</sub> SNO-His <sup>+</sup> - Asp <sup>-</sup> /Glu <sup>-</sup>                  | N-S        | O            | 1.583            |
| <i>trans</i> -CH <sub>3</sub> SNO-His <sup>+</sup> - Asp <sup>-</sup> /Glu <sup>-</sup>                  | N-S        | N            | 1.727            |
| <i>trans</i> -CH <sub>3</sub> SNO-Lys <sup>+</sup> - Asp <sup>-</sup> /Glu <sup>-</sup>                  | N-S        | O            | 1.569            |
| <i>trans</i> -CH <sub>3</sub> SNO-Lys <sup>+</sup> - Asp <sup>-</sup> /Glu <sup>-</sup>                  | N-S        | N            | 1.710            |
| <i>trans</i> -CH <sub>3</sub> SNO-Asp <sup>0</sup> /Glu <sup>0</sup> -Asp <sup>-</sup> /Glu <sup>-</sup> | N-S        | O            | 1.694            |
| <i>trans</i> -CH <sub>3</sub> SNO-Asp <sup>0</sup> /Glu <sup>0</sup> -Asp <sup>-</sup> /Glu <sup>-</sup> | N-S        | N            | 1.804            |
| <i>trans</i> -CH <sub>3</sub> SNO-Arg <sup>+</sup> -His <sup>0</sup>                                     | N-S        | O*,N         | 1.877            |
|                                                                                                          | N-S        | O,N*         | 2.014            |
| <i>trans</i> -CH <sub>3</sub> SNO-His <sup>+</sup> -His <sup>0</sup>                                     | N-S        | O            | 1.685            |
| <i>trans</i> -CH <sub>3</sub> SNO-His <sup>+</sup> -His <sup>0</sup>                                     | N-S        | N            | 1.835            |
| <i>trans</i> -CH <sub>3</sub> SNO-Lys <sup>+</sup> -His <sup>0</sup>                                     | N-S        | O            | 1.664            |
| <i>trans</i> -CH <sub>3</sub> SNO-Lys <sup>+</sup> -His <sup>0</sup>                                     | N-S        | N            | 1.813            |
